# Supplementary material for: Localization of epitopes recognized by monoclonal antibodies that neutralized the H3N2 influenza viruses in man
Source: PubMed Central journal article supplement (PMC3081080; doi:10.1099/vir.0.026419-0), 2011-02
Supplement: supp_92_2_326__1.pdf [file supp_92_2_326__1.pdf]

## Supplementary Methods

### Construction of plasmid DNAs for cell-surface expression of HA and chimaeric HAs.

The pNOW3 expression vector (Ohtani *et al.*, 1999) was donated by Dr Y. Suzuki (Osaka Prefecture Institute of Public Health). First, the DNA fragment encoding HA of the Aichi/68 strain was inserted into the *NotI/XbaI* site of pNOW3. However, the *XbaI* site was replaced by the *NheI* site to facilitate construction of vectors that expressed HAs of the other four strains. This plasmid was termed pNOW3/Aic68HA. RNAs were extracted from four kinds of influenza viruses: A/Yamanashi/2/77, A/Fukuoka/C29/85, A/Sydney/5/97 and A/Wyoming/3/2003. DNA fragments encoding entire HA molecules were amplified by RT-PCR by using virus RNA as a template and the following two primers: HA-F primer: 5'-TATGCGGCCGCATGAAGACTATCATTGCTTTGAGCTAC (*NotI* site underlined); and HA-R primer: 5'-CTAGCTAGCTCAAATGCAAATGTTGCACCTAATG (*NheI* site underlined). The amplified fragments were inserted into the *NotI/NheI* site of pNOW3/Aic68HA, resulting in four kinds of HA-expressing plasmid DNAs: pNOW3/Yam77HA, pNOW3/Fuk85HA, pNOW3/Syd97HA and pNOW3/Wyo03HA.

DNAs encoding chimaeric HA variant proteins were prepared according to the following procedure. Using the five kinds of HA-expressing plasmid DNAs as template, artificial genes encoding chimaeric HAs in which one of the seven sites (A, B1, B2, C1, C2, D and E) was replaced by some other strain-derived sequence were generated by two-step PCR. Two kinds of primers covering the site that was planned to be replaced were prepared. One primer was a forward (F) primer, and the other was a reverse (R) primer, and both primers could form a hybrid. In the present study, we constructed nine, eight, eight, nine and seven kinds of chimaeric HAs for the Aichi/68, Yamanashi/77, Fukuoka/85, Sydney/97 and Wyoming/2003 strains, respectively. Therefore, 41 pairs of F and R primers were prepared. The nucleotide sequences of these primers are listed in Supplementary Fig. S1. Other than these primers, two common primers were prepared: pNOW3F: 5'-TTGACGCAAATGGGCGGTAG; and pNOW3R: 5'-TAGGAAAGGACAGTGGGAGTGG. They correspond to the upstream sequence of the *NotI* site in pNOW3 and the downstream sequence of the *NheI* site in pNOW3, respectively. For example, to make a chimaeric HA, A68/50C1, that was a variant of Aichi/68HA whose site C1 was replaced, the first PCR was performed as follows. By using pNOW3/Aic68HA as a template and pNOW3F and A68/50C1/R primers, the

**Okada, J., Ohshima, N., Kubota-Koketsu, R., Iba, Y., Ota, S., Takase, W., Yoshikawa, T., Ishikawa, T., Asano, Y., Okuno, Y. and Kurosawa, Y. (2011).** Localization of epitopes recognized by monoclonal antibodies that neutralized the H3N2 influenza viruses in man. *J Gen Virol* **92**, 326–335.

DNA fragment sandwiched by the two primers was amplified. Separately, by using pNOW3/Aic68HA as a template and A68/50C1/F and pNOW3R primers, the DNA fragment sandwiched by the two primers was amplified. Both amplified fragments were purified by gel electrophoresis. Then, the second PCR was performed. After they were mixed, DNA encoding the entire HA region was amplified by using pNOW3F and pNOW3R primers. The DNA encoding the entire HA containing a replaced portion was inserted into the *NotI/NheI* portion of the pNOW3 vector. After construction of the plasmid, the DNA nucleotide sequence of the HA-coding region was determined. We prepared 41 kinds of plasmid DNAs essentially in the same way as described here. The DNA sequences indicated that there was no case in which a wrong nucleotide was incorporated during the construction of plasmid DNAs.

### Supplementary Reference

**Ohtani, K., Suzuki, Y., Eda, S., Kawai, T., Kase, T., Keshi, H., Sakai, Y., Yamamoto, S., Sakamoto, T. & Wakamiya, N. (1999).** High-level and effective production of human mannan-binding lectin (MBL) in Chinese hamster ovary (CHO) cells. *J Immunol Methods* **222**, 135–144. [Medline](#)

---

**Supplementary Fig. S1.** Nucleotide sequences of the primers used in PCR for construction of chimaeric HA genes. Codons encoding amino acids newly replaced in the chimaeric HA are indicated in red in the forward (F) primers. Anticodons encoding amino acids newly generated in the chimaeric HA are indicated in blue in the reverse (R) primers.

**Okada, J., Ohshima, N., Kubota-Koketsu, R., Iba, Y., Ota, S., Takase, W., Yoshikawa, T., Ishikawa, T., Asano, Y., Okuno, Y. and Kurosawa, Y. (2011).** Localization of epitopes recognized by monoclonal antibodies that neutralized the H3N2 influenza viruses in man. *J Gen Virol* **92**, 326–335.

| Forward primer |                                                                  | Reverse primer |                                                          |
|----------------|------------------------------------------------------------------|----------------|----------------------------------------------------------|
| A68/50C1/F     | 5'-ggGGAatatgcGACAGTcctcatCAAatcctctgatggaGAAACctgcacactgatagatg | A68/50C1/R     | 5'-caGTTTccatcaaggatTTGatgaggACTGTGcatatTCccccctgtgaggag |
| A68/78E/F      | 5'-gatGGTtttcaaaatAAGGAatgggacctt                                | A68/78E/R      | 5'-ccaTCCCTAttttggaaaACCatcacaagt                        |
| A68/121A/F     | 5'-ttAACAAATgagAGTttcAATtggGCTgggtcactcag                        | A68/121A/R     | 5'-ccAGCCcaATTgaaACTcctATTGTTAaactccagagtgctt            |
| A68/133A/F     | 5'-ggtcactcagAGTggggggaagcaatg                                   | A68/133A/R     | 5'-cccATTcctgagtgaccaccagtc                              |
| A68/142A/F     | 5'-gcaaaaaggAGATCTAATPAGAGTttttttc                               | A68/142A/R     | 5'-aACTCTTATTAGATCTccttttgcgaagcat                       |
| A68/154B1/F    | 5'-ggCTgaccCACTTAAATACAAatccaGGGctgaacgtgactatg                  | A68/154B1/R    | 5'-agCGctggatattTTGATATTTAAAGTgggtCAGCagcattcagctctagt   |
| A68/188B2/F    | 5'-cgGACTCAGATcaatAGCctctatGCTcaagctcagggaga                     | A68/188B2/R    | 5'-tgAGCatacaggctGATttgATCTGAGTCogtgcctgggtgg            |
| A68/219D/F     | 5'-TACagaccCGGtaagGATATCTctagt                                   | A68/219D/R     | 5'-aGATTCcctatGACCGgggtctGTAcccga                        |
| A68/275C2/F    | 5'-ttGGTAAGTgtAATtctgaatgcatcactcc                               | A68/275C2/R    | 5'-gaATTacaCTTACcaatagtgatctgtac                         |

| Forward primer |                                           | Reverse primer |                                        |
|----------------|-------------------------------------------|----------------|----------------------------------------|
| Y77/50C1/F     | 5'-gtAAAatatgcACAATcctcatcgaatccttgatg    | Y77/50C1/R     | 5'-gaggATTGTgcatatTTTactctgtgaggaactc  |
| Y77/82E/F      | 5'-caaaaatAAGGAatgggacctttttgttgaac       | Y77/82E/R      | 5'-ggtcccaTCCCTAttttggaaagccatcacaagt  |
| Y77/142A/F     | 5'-ggAGATCTAATAAGagtttcttcagtagactgaa     | Y77/142A/R     | 5'-gaaactCTTATTAGATCTccttttgcgaagcagag |
| Y77/155B1/F    | 5'-ggttgACCCATAAAATACAaaatctccagtgctggaac | Y77/155B1/R    | 5'-GTATTTAAATGGGTcaaccagttcagttctac    |
| Y77/186B2/F    | 5'-GTCacgacAGTGACcaaaaccaatattgttcaag     | Y77/186B2/R    | 5'-GTCACtgcctgGACCGgggtggtgaacc        |
| Y77/276C2/F    | 5'-ggcAAGtgcAATtctgaatgcatcactcc          | Y77/276C2/R    | 5'-cagaATTgcaCTTgccaataggtgactc        |

| Forward primer |                                            | Reverse primer |                                              |
|----------------|--------------------------------------------|----------------|----------------------------------------------|
| F85/50C1/F     | 5'-caggtAAAatatgcACAATcctcaccgaatcctttg    | F85/50C1/R     | 5'-gaggATTGTgcatatTTTactctgtgaggaactctg      |
| F85/82E/F      | 5'-ccaaaatAAGGAatgggacctttttgttgaac        | F85/82E/R      | 5'-ggtcccaTCCCTAttttggaaagccatcacaagt        |
| F85/133A/F     | 5'-agAATgggACAagctCTgcttgcgaaggggagtc      | F85/133A/R     | 5'-gcAGagctTGtcccATTctgagtgtaccagtc          |
| F85/142A/F     | 5'-ggCGATctAATAAGagtttcttcagtagactgaa      | F85/142A/R     | 5'-gaaactCTTATTAGATCTccttttgcgaagcagag       |
| F85/155B1/F    | 5'-gaatgtgttGACCCAAATAAAACAaaatctccagcgctg | F85/155B1/R    | 5'-gatattttgataTTTAAATGGGTcaaccaatcactactgaa |
| F85/186B2/F    | 5'-cgGTCacgacAGCGCACaaaccaatctatagtctg     | F85/186B2/R    | 5'-tgTCGCTgctcogGACCGgggtggtgaacc            |
| F85/219D/F     | 5'-ggTATagaccCGGtaaggggtctg                | F85/219D/R     | 5'-accCGgggtctATAcccagatctcgggatt            |
| F85/276C2/F    | 5'-ggcAAGtgcAATtctgaatgcatcactccaa         | F85/276C2/R    | 5'-ttcagaATTgcaCTTgccaataggtgactc            |

| Forward primer |                                            | Reverse primer |                                            |
|----------------|--------------------------------------------|----------------|--------------------------------------------|
| S97/50C1/F     | 5'-caggtAAAatatgcACAACcctcaccgaatc         | S97/50C1/R     | 5'-gGTTGTgcatatTTTactctgtgaggaactc         |
| S97/82E/F      | 5'-caaaaatGAGACTgggacctttttgttgaac         | S97/82E/R      | 5'-ggtcccaTGCTCattttggaaagccatcacaat       |
| S97/121A/F     | 5'-ATCACTgaaGGcttCACTtgactggagtc           | S97/121A/R     | 5'-AGTgaaGCcttCACTGATaaactccaggtgctc       |
| S97/131A/F     | 5'-cACTcagaatggaGGAagcAATgcttgcgaagggagtc  | S97/131A/R     | 5'-cATTgctTCctccattctAGTgactccagtc         |
| S97/142A/F     | 5'-ggGCTcctGGTAGGTTtcttcttagtagtgaattgg    | S97/142A/R     | 5'-aACCATACCAGGACCCcttttgcgaagcagag        |
| S97/155B1/F    | 5'-gACCAATCAGGATCCACAtatccagcactgaagc      | S97/155B1/R    | 5'-TGTGGATCCTGATTGGTcaaccaatcactactaaag    |
| S97/189B2/F    | 5'-cCAGGAACAaaccagctTTAtatGTTcaagctcagggag | S97/189B2/R    | 5'-AACataAGactgggtttTCTCTgctcactcgg        |
| S97/219D/F     | 5'-aATAgaccCCGGtaagggGATatctccagcagaataag  | S97/219D/R     | 5'-ATCCcttaccCGgggtctATAtccgatatctgggattac |
| S97/275C2/F    | 5'-cattGACACatgcAATtctgaatgcatcactcc       | S97/275C2/R    | 5'-cagaAATgcaTGTCTcaatgggtgactctga         |

| Forward primer |                                               | Reverse primer |                                                 |
|----------------|-----------------------------------------------|----------------|-------------------------------------------------|
| W03/50C1/F     | 5'-caggtAAAatatgcACAATcctcatcagatccttgatg     | W03/50C1/R     | 5'-gaggATTGTgcatatTTTactctgtgaggaactcctggaac    |
| W03/82E/F      | 5'-ccaaaatGAGACTgggacctttttgttgg              | W03/82E/R      | 5'-aggtcccaTGCTCattttggaaagcc                   |
| W03/142A/F     | 5'-ggACTGTTAGCGGtttcttttagtagattgaaattggttg   | W03/142A/R     | 5'-gaaACCCGTACCAGTCCcttttgcgaagcagagcttg        |
| W03/156B1/F    | 5'-gaccAAATCAGGATCCACAtaccagcattgaaactgac     | W03/156B1/R    | 5'-ggataTGTGGATCCTGATTGgtcaaccaatcactctac       |
| W03/189B2/F    | 5'-cCAGGAACAaaccagctatctcgaagcactgag          | W03/189B2/R    | 5'-catatagCTTGGTttTCTCTgctcagtaaccgggtg         |
| W03/219D/F     | 5'-TCTagaccCTGGgttaagggTCTCCcagcagaataagcactc | W03/219D/R     | 5'-GAGACccctaccCCAGggtcLAGatccgatattcgggattacag |
| W03/275C2/F    | 5'-ccattGACACatgcAATtctgaatgcatcactcc         | W03/275C2/R    | 5'-cagaAATgcaTGTCTcaatgggtgactctgactc           |
